# Supplementary material for: The rise and spread of the SARS-CoV-2 AY.122 lineage in Russia
Source: PubMed Central journal article supplement — medRxiv. 2021 Dec 5:2021.12.02.21267168. Preprint. [Version 1] doi: 10.1101/2021.12.02.21267168 (PMC8669866; doi:10.1101/2021.12.02.21267168), 2021-12-05
Supplement: media-3.pdf [file media-3.pdf]

**Federal Budget Institution of Science “Central Research Institute for Epidemiology” of the Federal Service for Supervision of Consumer Rights Protection and Human Welfare (Rospotrebnadzor), Moscow, Russia**

Akimkin V.G.,

Borisova N.I.,

Budkina A.Y.,

Buharina A.Y.,

Bulanenko V.P.,

Cherkashina A.S.,

Chudinov I.K.,

Dolotova S.M.,

Golubeva A.G.,

Goncharov S.E.,

Gulboy E.Y.,

Kaptelova V.V.,

Khafizov K.F.,

Kolesnikov A.A.,

Kondrasheva L.Y.,

Korneenko E.V.,

Kotov I.A.,

Marakulina D.A.,

Mikheeva O.O.,

Mityanina Y.A.,

Nadtoka M.I.,

Noskova O.M.,

Roev G.V.,

Saenko S.S.,

Samoilov A.E.,

Selezov S.Y.,  
Shipulina O.Y.,  
Sinitsyn S.O.,  
Smirnova Y.S.,  
Solovieva E.D.,  
Speranskaya A.S.,  
Svetlichnyj D.V.,  
Tivanova E.V.,  
Valdohina A.V.,  
Vyhodceva A.V.,  
Zotova M.I.,  
Zuev S.N.
